# Supplementary material for: Multiplexed RT-qPCR Coupled with Whole-Genome Sequencing to Monitor a SARS-CoV-2 Omicron Variant of Concern in a Hospital Laboratory Setting in Latvia
Source: MDPI journal article supplement (doi:10.3390/diagnostics13223467), 2023-11-17
Supplement: s1 [file s1]

**Table S1.**

The presumptive and actual WHO labels and PANGO lineages of the specimens with discordant target detections by multiplexed RT-qPCR, validated against WGS results

| Multiplexed RT-qPCR    |              |                 |     |        |   |           |   |
|------------------------|--------------|-----------------|-----|--------|---|-----------|---|
| ΔH69/V70, E484A, N501Y | E484A, N501Y | ΔH69/V70, N501Y | -   |        |   |           |   |
| BA.1                   | 677          | BA.2            | 251 | Other  | 8 | Delta     | 2 |
| WGS                    |              |                 |     |        |   |           |   |
| BA.1                   | 136          | BA.2            | 204 | BA.1.1 | 8 | AY.4      | 1 |
| BA.1.1                 | 221          | BA.2.1          | 3   |        |   | B.1.617.2 | 1 |
| BA.1.1.1               | 18           | BA.2.22         | 2   |        |   |           |   |
| BA.1.1.11              | 2            | BA.2.3          | 1   |        |   |           |   |
| BA.1.1.14              | 11           | BA.2.9          | 41  |        |   |           |   |
| BA.1.1.15              | 2            |                 |     |        |   |           |   |
| BA.1.10                | 1            |                 |     |        |   |           |   |
| BA.1.13                | 3            |                 |     |        |   |           |   |
| BA.1.14                | 1            |                 |     |        |   |           |   |
| BA.1.15                | 76           |                 |     |        |   |           |   |
| BA.1.15.1              | 14           |                 |     |        |   |           |   |
| BA.1.16                | 5            |                 |     |        |   |           |   |
| BA.1.17                | 38           |                 |     |        |   |           |   |
| BA.1.17.2              | 104          |                 |     |        |   |           |   |
| BA.1.18                | 13           |                 |     |        |   |           |   |
| BA.1.20                | 9            |                 |     |        |   |           |   |
| BA.1.21                | 18           |                 |     |        |   |           |   |
| BD.1                   | 5            |                 |     |        |   |           |   |
