# Supplementary material for: Multiplexed RT-qPCR Coupled with Whole-Genome Sequencing to Monitor a SARS-CoV-2 Omicron Variant of Concern in a Hospital Laboratory Setting in Latvia
Source: MDPI journal article supplement (doi:10.3390/diagnostics13223467), 2023-11-17
Supplement: s1 [file s1]

[illegible]

EPI\_ISL\_9705685, EPI\_ISL\_9705684, EPI\_ISL\_9705683, EPI\_ISL\_9705682,  
EPI\_ISL\_9705681, EPI\_ISL\_9705679, EPI\_ISL\_9705678, EPI\_ISL\_9705677,  
EPI\_ISL\_9705676, EPI\_ISL\_9705675, EPI\_ISL\_9705674, EPI\_ISL\_9705673,  
EPI\_ISL\_9705671, EPI\_ISL\_9705668, EPI\_ISL\_9705664, EPI\_ISL\_9705631,  
EPI\_ISL\_9705630, EPI\_ISL\_9705629, EPI\_ISL\_9705628, EPI\_ISL\_9705626,  
EPI\_ISL\_9705625, EPI\_ISL\_9705623, EPI\_ISL\_9705620, EPI\_ISL\_9705619,  
EPI\_ISL\_9705616, EPI\_ISL\_9705613, EPI\_ISL\_9705612, EPI\_ISL\_9705606,  
EPI\_ISL\_9705604, EPI\_ISL\_9705601, EPI\_ISL\_9705599, EPI\_ISL\_9705598,  
EPI\_ISL\_9705597, EPI\_ISL\_9705594, EPI\_ISL\_9705593, EPI\_ISL\_9705590,  
EPI\_ISL\_9705589, EPI\_ISL\_9705584, EPI\_ISL\_9705582, EPI\_ISL\_9705579,  
EPI\_ISL\_9705577, EPI\_ISL\_9705575, EPI\_ISL\_9705574, EPI\_ISL\_9705572,  
EPI\_ISL\_9705571, EPI\_ISL\_9705569, EPI\_ISL\_9705568, EPI\_ISL\_9705567,  
EPI\_ISL\_9705566, EPI\_ISL\_9705556, EPI\_ISL\_9705555, EPI\_ISL\_9705554,  
EPI\_ISL\_9705553, EPI\_ISL\_9705550, EPI\_ISL\_9705549, EPI\_ISL\_9705546,  
EPI\_ISL\_9705545, EPI\_ISL\_9705544, EPI\_ISL\_9705538, EPI\_ISL\_9705532,  
EPI\_ISL\_9705529, EPI\_ISL\_9705528, EPI\_ISL\_9705526, EPI\_ISL\_9705524,  
EPI\_ISL\_9705522, EPI\_ISL\_9705521, EPI\_ISL\_9705520, EPI\_ISL\_9705519,  
EPI\_ISL\_9705518, EPI\_ISL\_9705513, EPI\_ISL\_9705512, EPI\_ISL\_9705508,  
EPI\_ISL\_9705506, EPI\_ISL\_9705503, EPI\_ISL\_9705502, EPI\_ISL\_9705496,  
EPI\_ISL\_9705494, EPI\_ISL\_9705490, EPI\_ISL\_9705489, EPI\_ISL\_9705486,  
EPI\_ISL\_9705484, EPI\_ISL\_9705483, EPI\_ISL\_9705482, EPI\_ISL\_9705481,  
EPI\_ISL\_9705480, EPI\_ISL\_9705473, EPI\_ISL\_9705472, EPI\_ISL\_9705465,  
EPI\_ISL\_9705464, EPI\_ISL\_9705462, EPI\_ISL\_9705457, EPI\_ISL\_9705453,  
EPI\_ISL\_9705452, EPI\_ISL\_9705450, EPI\_ISL\_9705444, EPI\_ISL\_9705443,  
EPI\_ISL\_9705442, EPI\_ISL\_9705440, EPI\_ISL\_9705435, EPI\_ISL\_9705428,  
EPI\_ISL\_9705427, EPI\_ISL\_9705425, EPI\_ISL\_9705422, EPI\_ISL\_9705419,  
EPI\_ISL\_9705417, EPI\_ISL\_9705413, EPI\_ISL\_9705376, EPI\_ISL\_9705375,  
EPI\_ISL\_9705373, EPI\_ISL\_9705371, EPI\_ISL\_9705361, EPI\_ISL\_9705360,  
EPI\_ISL\_9705355, EPI\_ISL\_9705352, EPI\_ISL\_9705350, EPI\_ISL\_9705344,  
EPI\_ISL\_9705343, EPI\_ISL\_13631122, EPI\_ISL\_13631060, EPI\_ISL\_13630303,  
EPI\_ISL\_13630300, EPI\_ISL\_13630288, EPI\_ISL\_13630286, EPI\_ISL\_13630273,  
EPI\_ISL\_13630245, EPI\_ISL\_13630229, EPI\_ISL\_13630225, EPI\_ISL\_13630218,  
EPI\_ISL\_13630215, EPI\_ISL\_13630213, EPI\_ISL\_13630212, EPI\_ISL\_13630209,  
EPI\_ISL\_13630205, EPI\_ISL\_13630200, EPI\_ISL\_13630186, EPI\_ISL\_13630185,  
EPI\_ISL\_13630184, EPI\_ISL\_13630183, EPI\_ISL\_13630174, EPI\_ISL\_13630168,  
EPI\_ISL\_13630167, EPI\_ISL\_13630163, EPI\_ISL\_13630161, EPI\_ISL\_13630159,  
EPI\_ISL\_13630149, EPI\_ISL\_13630145, EPI\_ISL\_13630144, EPI\_ISL\_13630138,  
EPI\_ISL\_13630131, EPI\_ISL\_13630130, EPI\_ISL\_13630125, EPI\_ISL\_13630120,  
EPI\_ISL\_13630117, EPI\_ISL\_13630116, EPI\_ISL\_13630115, EPI\_ISL\_13630110,  
EPI\_ISL\_13630108, EPI\_ISL\_13630107, EPI\_ISL\_13630101, EPI\_ISL\_13630099,  
EPI\_ISL\_13630089, EPI\_ISL\_13630088, EPI\_ISL\_13630074, EPI\_ISL\_13630067,  
EPI\_ISL\_13630065, EPI\_ISL\_13630064, EPI\_ISL\_13630061, EPI\_ISL\_13630055,  
EPI\_ISL\_13630043, EPI\_ISL\_13630039, EPI\_ISL\_13630038, EPI\_ISL\_13630037,  
EPI\_ISL\_13630030, EPI\_ISL\_13630027, EPI\_ISL\_13630023, EPI\_ISL\_13630021,  
EPI\_ISL\_13630019, EPI\_ISL\_13630015, EPI\_ISL\_13630014, EPI\_ISL\_13630011,  
EPI\_ISL\_13630009, EPI\_ISL\_13630008, EPI\_ISL\_13630007, EPI\_ISL\_13629996,

[illegible]

EPI\_ISL\_13629240, EPI\_ISL\_13629237, EPI\_ISL\_13629236, EPI\_ISL\_13629235,  
EPI\_ISL\_13629233, EPI\_ISL\_13629230, EPI\_ISL\_13629229, EPI\_ISL\_13629223,  
EPI\_ISL\_13629221, EPI\_ISL\_13629208, EPI\_ISL\_13629204, EPI\_ISL\_13629186,  
EPI\_ISL\_13629183, EPI\_ISL\_13629179, EPI\_ISL\_13629178, EPI\_ISL\_13629173,  
EPI\_ISL\_13629169, EPI\_ISL\_13629168, EPI\_ISL\_13629167, EPI\_ISL\_13629166,  
EPI\_ISL\_13629165, EPI\_ISL\_13629156, EPI\_ISL\_13629152, EPI\_ISL\_13629147,  
EPI\_ISL\_13629146, EPI\_ISL\_13629144, EPI\_ISL\_13629140, EPI\_ISL\_13629131,  
EPI\_ISL\_13629130, EPI\_ISL\_13629127, EPI\_ISL\_13629114, EPI\_ISL\_13629113,  
EPI\_ISL\_13629100, EPI\_ISL\_13629095, EPI\_ISL\_13629063, EPI\_ISL\_13629053,  
EPI\_ISL\_13629044, EPI\_ISL\_13629041, EPI\_ISL\_13629035, EPI\_ISL\_13629027,  
EPI\_ISL\_13629023, EPI\_ISL\_13629015, EPI\_ISL\_13629014, EPI\_ISL\_13628993,  
EPI\_ISL\_13628992, EPI\_ISL\_13628980, EPI\_ISL\_13628979, EPI\_ISL\_13628973,  
EPI\_ISL\_13628967, EPI\_ISL\_13628960, EPI\_ISL\_13628959, EPI\_ISL\_13628953,  
EPI\_ISL\_13628952, EPI\_ISL\_13628947, EPI\_ISL\_13628944, EPI\_ISL\_13628942,  
EPI\_ISL\_13628939, EPI\_ISL\_13628926, EPI\_ISL\_13628922, EPI\_ISL\_13628920,  
EPI\_ISL\_13628917, EPI\_ISL\_13628907, EPI\_ISL\_13628902, EPI\_ISL\_13628889,  
EPI\_ISL\_13628886, EPI\_ISL\_13628875, EPI\_ISL\_13628873, EPI\_ISL\_13628870,  
EPI\_ISL\_13628864, EPI\_ISL\_13628862, EPI\_ISL\_13628860, EPI\_ISL\_13628858,  
EPI\_ISL\_13628851, EPI\_ISL\_13628850, EPI\_ISL\_13628847, EPI\_ISL\_13628838,  
EPI\_ISL\_13628837, EPI\_ISL\_13628831, EPI\_ISL\_13628830, EPI\_ISL\_13628817,  
EPI\_ISL\_13628813, EPI\_ISL\_13628811, EPI\_ISL\_13628809, EPI\_ISL\_13628797,  
EPI\_ISL\_13628795, EPI\_ISL\_13628792, EPI\_ISL\_13628783, EPI\_ISL\_13628781,  
EPI\_ISL\_13628779, EPI\_ISL\_13628772, EPI\_ISL\_13628767, EPI\_ISL\_13628766,  
EPI\_ISL\_13628756, EPI\_ISL\_13628743, EPI\_ISL\_13628742, EPI\_ISL\_13628730,  
EPI\_ISL\_13628729, EPI\_ISL\_13628728, EPI\_ISL\_13628725, EPI\_ISL\_13628716,  
EPI\_ISL\_13628712, EPI\_ISL\_13628705, EPI\_ISL\_13628704, EPI\_ISL\_13628703,  
EPI\_ISL\_13628693, EPI\_ISL\_13628688, EPI\_ISL\_13628681, EPI\_ISL\_13628680,  
EPI\_ISL\_13628668, EPI\_ISL\_13628667, EPI\_ISL\_13628655, EPI\_ISL\_13628651,  
EPI\_ISL\_13628649, EPI\_ISL\_13628648, EPI\_ISL\_13628638, EPI\_ISL\_13628635,  
EPI\_ISL\_13628630, EPI\_ISL\_13628628, EPI\_ISL\_13628624, EPI\_ISL\_13628621,  
EPI\_ISL\_13628617, EPI\_ISL\_13628616, EPI\_ISL\_13628613, EPI\_ISL\_13628598,  
EPI\_ISL\_13628597, EPI\_ISL\_13628592, EPI\_ISL\_13628584, EPI\_ISL\_13628582,  
EPI\_ISL\_13628577, EPI\_ISL\_13628574, EPI\_ISL\_13628571, EPI\_ISL\_13628569,  
EPI\_ISL\_13628565, EPI\_ISL\_13628550, EPI\_ISL\_13628542, EPI\_ISL\_13628537,  
EPI\_ISL\_13628533, EPI\_ISL\_13628530, EPI\_ISL\_13628522, EPI\_ISL\_13628512,  
EPI\_ISL\_13628505, EPI\_ISL\_13628504, EPI\_ISL\_13628497, EPI\_ISL\_13628496,  
EPI\_ISL\_13628490, EPI\_ISL\_13628487, EPI\_ISL\_13628482, EPI\_ISL\_13628475,  
EPI\_ISL\_13628460, EPI\_ISL\_13628448, EPI\_ISL\_13628444, EPI\_ISL\_13628431,  
EPI\_ISL\_13628427, EPI\_ISL\_13628421, EPI\_ISL\_13628408, EPI\_ISL\_13628396,  
EPI\_ISL\_13628394, EPI\_ISL\_13628393, EPI\_ISL\_13628392, EPI\_ISL\_13628385,  
EPI\_ISL\_13628384, EPI\_ISL\_13628364, EPI\_ISL\_13628361, EPI\_ISL\_13628356,  
EPI\_ISL\_13628354, EPI\_ISL\_13628348, EPI\_ISL\_13628344, EPI\_ISL\_13628329,  
EPI\_ISL\_13628327, EPI\_ISL\_13628324, EPI\_ISL\_13628316, EPI\_ISL\_13628314,  
EPI\_ISL\_13628310, EPI\_ISL\_13628307, EPI\_ISL\_13628304, EPI\_ISL\_13628294,  
EPI\_ISL\_13628293, EPI\_ISL\_13628291, EPI\_ISL\_13628290, EPI\_ISL\_13628284,  
EPI\_ISL\_13628283, EPI\_ISL\_13628282, EPI\_ISL\_13628278, EPI\_ISL\_13628275,

EPI\_ISL\_13628270, EPI\_ISL\_13628244, EPI\_ISL\_13628228, EPI\_ISL\_13628226,  
EPI\_ISL\_13628225, EPI\_ISL\_13628223, EPI\_ISL\_13628220, EPI\_ISL\_13628214,  
EPI\_ISL\_13628211, EPI\_ISL\_13628206, EPI\_ISL\_13628202, EPI\_ISL\_13628200,  
EPI\_ISL\_13628193, EPI\_ISL\_13628190, EPI\_ISL\_13628176, EPI\_ISL\_13628155,  
EPI\_ISL\_13628150, EPI\_ISL\_13628142, EPI\_ISL\_13628130, EPI\_ISL\_13628129,  
EPI\_ISL\_13628127, EPI\_ISL\_13628112, EPI\_ISL\_13628110, EPI\_ISL\_13628100,  
EPI\_ISL\_13628092, EPI\_ISL\_13628091, EPI\_ISL\_13628089, EPI\_ISL\_13628087,  
EPI\_ISL\_13628085, EPI\_ISL\_13628076, EPI\_ISL\_13628071, EPI\_ISL\_13628067,  
EPI\_ISL\_13628055, EPI\_ISL\_13628044, EPI\_ISL\_13628041, EPI\_ISL\_13628034,  
EPI\_ISL\_13628029, EPI\_ISL\_13628025, EPI\_ISL\_13628024, EPI\_ISL\_13628021,  
EPI\_ISL\_13628008, EPI\_ISL\_13628005, EPI\_ISL\_13628002, EPI\_ISL\_13628001,  
EPI\_ISL\_13627998, EPI\_ISL\_13627990, EPI\_ISL\_13627986, EPI\_ISL\_13627969,  
EPI\_ISL\_13627956, EPI\_ISL\_13627955, EPI\_ISL\_13627951, EPI\_ISL\_13627948,  
EPI\_ISL\_13627941, EPI\_ISL\_13627937, EPI\_ISL\_13627934, EPI\_ISL\_13627924,  
EPI\_ISL\_13627921, EPI\_ISL\_13627918, EPI\_ISL\_13627915, EPI\_ISL\_13627910,  
EPI\_ISL\_13627906, EPI\_ISL\_13627904, EPI\_ISL\_13627895, EPI\_ISL\_13627893,  
EPI\_ISL\_13627891, EPI\_ISL\_13627886, EPI\_ISL\_13627881, EPI\_ISL\_13627873,  
EPI\_ISL\_13627870, EPI\_ISL\_13627863, EPI\_ISL\_13627855, EPI\_ISL\_13627853,  
EPI\_ISL\_13627845, EPI\_ISL\_13627842, EPI\_ISL\_13627839, EPI\_ISL\_13627838,  
EPI\_ISL\_13627837, EPI\_ISL\_13627826, EPI\_ISL\_13627817, EPI\_ISL\_13627815,  
EPI\_ISL\_13627814, EPI\_ISL\_13627803, EPI\_ISL\_13627799, EPI\_ISL\_13627790,  
EPI\_ISL\_13627786, EPI\_ISL\_13627780, EPI\_ISL\_13627779, EPI\_ISL\_13627776,  
EPI\_ISL\_13627774, EPI\_ISL\_13627771, EPI\_ISL\_13627770, EPI\_ISL\_13627760,  
EPI\_ISL\_13627759, EPI\_ISL\_13627758, EPI\_ISL\_13627752, EPI\_ISL\_13627751,  
EPI\_ISL\_13627748, EPI\_ISL\_13627730, EPI\_ISL\_13627727, EPI\_ISL\_13627723,  
EPI\_ISL\_13627716, EPI\_ISL\_13627709, EPI\_ISL\_13627702, EPI\_ISL\_13627700,  
EPI\_ISL\_13627686, EPI\_ISL\_13627679, EPI\_ISL\_13627672, EPI\_ISL\_13627659,  
EPI\_ISL\_13627655, EPI\_ISL\_13627643, EPI\_ISL\_13627639, EPI\_ISL\_13627626,  
EPI\_ISL\_13627622, EPI\_ISL\_13627621, EPI\_ISL\_13627620, EPI\_ISL\_13627611,  
EPI\_ISL\_13627593, EPI\_ISL\_13627592, EPI\_ISL\_13627587, EPI\_ISL\_13627582,  
EPI\_ISL\_13627576, EPI\_ISL\_13627572, EPI\_ISL\_13627571, EPI\_ISL\_13627568,  
EPI\_ISL\_13627567, EPI\_ISL\_13627565, EPI\_ISL\_13627560, EPI\_ISL\_13627553,  
EPI\_ISL\_13627548, EPI\_ISL\_13627517, EPI\_ISL\_13627512, EPI\_ISL\_13627499,  
EPI\_ISL\_13627483, EPI\_ISL\_13627479, EPI\_ISL\_13627477, EPI\_ISL\_13627475,  
EPI\_ISL\_13627467, EPI\_ISL\_13627465, EPI\_ISL\_13627456, EPI\_ISL\_13627438,  
EPI\_ISL\_13627427, EPI\_ISL\_13627422, EPI\_ISL\_13627419, EPI\_ISL\_13627409,  
EPI\_ISL\_13627403, EPI\_ISL\_13627385, EPI\_ISL\_13627381, EPI\_ISL\_13627376,  
EPI\_ISL\_13627363, EPI\_ISL\_13627354, EPI\_ISL\_13627346, EPI\_ISL\_13627328,  
EPI\_ISL\_13627296, EPI\_ISL\_13627295, EPI\_ISL\_13627283, EPI\_ISL\_13627277,  
EPI\_ISL\_13627273, EPI\_ISL\_13627264, EPI\_ISL\_13627259, EPI\_ISL\_13627258,  
EPI\_ISL\_13627245, EPI\_ISL\_13627238, EPI\_ISL\_13627216, EPI\_ISL\_13627202,  
EPI\_ISL\_13627196, EPI\_ISL\_13627191, EPI\_ISL\_13627178, EPI\_ISL\_13627177,  
EPI\_ISL\_13627176, EPI\_ISL\_13627167, EPI\_ISL\_13627166, EPI\_ISL\_13627163,  
EPI\_ISL\_13627162, EPI\_ISL\_13627157, EPI\_ISL\_13627152, EPI\_ISL\_13627151,  
EPI\_ISL\_13627133, EPI\_ISL\_13627125, EPI\_ISL\_13627109, EPI\_ISL\_13627105,  
EPI\_ISL\_13627094, EPI\_ISL\_13627085, EPI\_ISL\_13627084, EPI\_ISL\_13627081,

EPI\_ISL\_13627064, EPI\_ISL\_13627059, EPI\_ISL\_13627055, EPI\_ISL\_13627042,  
EPI\_ISL\_13627032, EPI\_ISL\_13627011, EPI\_ISL\_13627010, EPI\_ISL\_13627007,  
EPI\_ISL\_13627003, EPI\_ISL\_13626991, EPI\_ISL\_13626982, EPI\_ISL\_13626958,  
EPI\_ISL\_13626939, EPI\_ISL\_13626938, EPI\_ISL\_13626922, EPI\_ISL\_13626920,  
EPI\_ISL\_13626917, EPI\_ISL\_13626913, EPI\_ISL\_13626912, EPI\_ISL\_13626911,  
EPI\_ISL\_13626888, EPI\_ISL\_13626873, EPI\_ISL\_13626870, EPI\_ISL\_13626849,  
EPI\_ISL\_13626848, EPI\_ISL\_13626825, EPI\_ISL\_13626823, EPI\_ISL\_13626815,  
EPI\_ISL\_13626807, EPI\_ISL\_13626797, EPI\_ISL\_13626792, EPI\_ISL\_13626790,  
EPI\_ISL\_13626778, EPI\_ISL\_13626776, EPI\_ISL\_13626775, EPI\_ISL\_13626770,  
EPI\_ISL\_13626768, EPI\_ISL\_13626766, EPI\_ISL\_13626744, EPI\_ISL\_13626738,  
EPI\_ISL\_13626729, EPI\_ISL\_13626728, EPI\_ISL\_13626718, EPI\_ISL\_13626715.
